1  
2  
3  
4  
5  
6  
7  
8  
9  
10  
11  
12  
13  
14  
15  
16  
17  
18  
19  
20  
21  
22  
23  
24  
25  
26  
27  
28  
29  
30  
31  
32  
33  
34  
35  
36  
37  
38  
39  
40  
41  
42  
43  
44  
45  
46  
47  
48  
49  
50

# Dynamics of visual perceptual decision-making in freely behaving mice

## ABSTRACT

Studying the temporal dynamics of perceptual decisions offers key insights into the cognitive processes contributing to it. Conducting such investigation in a genetically tractable animal model can facilitate the subsequent unpacking of the mechanistic basis of different stages in perceptual dynamics. Here, we investigated the time course as well as fundamental psychophysical constants governing visual perceptual decision-making in freely behaving mice. We did so by analyzing response accuracy against reaction time (i.e., conditional accuracy), in a series of 2-AFC orientation discrimination tasks in which we varied target size, luminance, duration, and presence of a foil. Our results quantified two distinct stages in the time course of mouse visual decision-making - a ‘sensory encoding’ stage, in which conditional accuracy exhibits a classic tradeoff with response speed, and a subsequent ‘short term memory-dependent’ stage in which conditional accuracy exhibits a classic asymptotic decay following stimulus offset. We estimated the duration of visual sensory encoding as 200-320 ms across tasks, the lower bound of the duration of short-term memory as ~1700 ms, and the briefest duration of visual stimulus input that is informative as  $\leq 50$  ms. Separately, by varying stimulus onset delay, we demonstrated that the conditional accuracy function and RT distribution can be independently modulated, and found that the duration for which mice naturally withhold from responding is a quantitative metric of impulsivity. Taken together, our results establish a quantitative foundation for investigating the neural circuit bases of visual decision dynamics in mice.

## SIGNIFICANCE STATEMENT

This study presents a quantitative breakdown of the time course of visual decision-making in mice during naturalistic behavior. It demonstrates parallel stages in mouse visual perceptual decision dynamics to those in humans, estimates their durations, and shows that mice are able to discriminate well under challenging visual conditions – with stimuli that are brief, low luminance, and small. These results set the stage for investigating the neural bases of visual perceptual decision dynamics and their dysfunction in mice.

## INTRODUCTION

Exploring the temporal dynamics of perceptual decisions from onset of the sensory input through the initiation of behavioral responses affords a key window into the underlying cognitive processes [1-3]. Investigations of such dynamics in humans [4, 5], and other species [6-8] have revealed distinct stages in perceptual processing, their timing, and their interactions. [9-11]. Performing such investigations in a genetically tractable animal model can additionally facilitate the subsequent unpacking of the mechanistic basis of different stages in perceptual dynamics. However, despite the recent rise in the use of the laboratory mouse for the study of the visual system [12-14] and of visually guided decision-making [15-25], the temporal dynamics of visual perceptual decisions represents a significant gap in mouse visual psychophysics [26-28].

In this study, we adapted approaches from human psychophysical studies to investigate the dynamics of visual decision-making in freely behaving mice. In a series of experiments involving touchscreen-based [24, 29], 2-alternative forced choice (2-AFC) orientation discrimination tasks, we investigated the effect of stimulus size, luminance, duration, delay, and the presence of a competing foil on mouse decision performance (accuracy and reaction time), and importantly, on the conditional accuracy function. We identified two distinct stages in the time-course of mouse visual decision-making within a trial, as has been reported in humans [30-37]. In the first ‘sensory encoding’ stage [30-33], response accuracy exhibited a classic tradeoff with response speed, and asymptoted to a peak level. In the next stage, response accuracy did not exhibit such a tradeoff, but instead, decayed following stimulus offset, consistent with a classic short-term memory (STM)-dependent process [34-37]. Combining these results with those from drift diffusion modeling [38] allowed us to estimate fundamental psychophysical constants in mouse perceptual

51 decision-making: the time needed by mice to complete visual sensory encoding, the duration for which their  
52 short term memory can intrinsically support discrimination behavior after stimulus input is removed, and  
53 the shortest visual stimulus duration that is informative. Additionally, by varying stimulus onset delay, we  
54 demonstrated that the two components of accuracy, namely, the conditional accuracy function and the RT  
55 distribution can be independently modulated by task parameters. This also allowed a quantitative estimation  
56 of impulsivity of mice. Together, this study reveals parallels between mouse and human visual decision  
57 dynamics, despite differences in their sensory apparatuses, and enable investigations into the neural circuit  
58 underpinnings of the time course of perceptual decision-making in mice.

59

## 60 METHODS

61 **Animals.** Thirty-seven mice (33 C57B16/J mice, all male; 4 PV-Cre mice, 3 female, Jackson Labs) were  
62 housed in a temperature (~75F) and humidity (~55%) controlled facility on a 12:12h light:dark cycle;  
63 ZT0=7 am. All procedures followed the NIH guidelines and were approved by the [Author Institutions]  
64 Animal Care and Use Committee (ACUC). Animals were allowed to acclimate for at least one week, with  
65 *ad libitum* access to food and water before water regulation was initiated per previously published  
66 procedures [39]. Briefly, mice were individually housed (for monitoring and control of daily water intake  
67 of each identified animal), and administered 1mL water per day to taper their body weight down, over the  
68 course of 5-7 days, to 80-85% of each animal's free-feeding baseline weight. During behavioral  
69 training/testing, the primary source of water for mice was as a reinforcer for correct performance: 10  $\mu$ L of  
70 water was provided for every correct response. Experiments were all carried out in the light phase.

71

72 **Apparatus.** Behavioral training and testing were performed in soundproof operant chambers equipped with  
73 a touchscreen (Med Associates Inc.), a custom-built reward port (fluid well), infrared video cameras, a  
74 house light and a magazine light above the reward port. The reward port was located at the opposite wall  
75 of the chamber relative to the touchscreen (Fig. 1A, 1-1A). Mice were placed within a clear plexiglass tube  
76 (5cm diameter) that connects the touchscreen and the reward port. A thin plexiglass mask (3 mm thickness)  
77 was placed 3 mm in front of the touchscreen with three apertures (1cm diameter) through which mouse was  
78 allowed to interact with the screen via nose-touch. The 'left' and 'right' apertures were placed 3cm apart  
79 (center-to-center) along the base of the triangle, and a 'central' aperture, at the apex of the triangle, was 1.5  
80 cm below the midpoint of the base. All experimental procedures were executed using control software (K-  
81 limbic, Med-Associates).

82

83 **Visual stimuli.** Visual stimuli were bright objects on the dark background (luminance = 1.32 cd/m<sup>2</sup>). A  
84 small cross (60x60 pixels; luminance = 130 cd/m<sup>2</sup>) was presented in the central aperture and had to be  
85 touched to initiate each trial. Oriented gratings (horizontal or vertical) were generated using a square wave,  
86 with fixed spatial frequency (24 pixels/cycle) known to be effective for mice to discriminate [17]. The dark  
87 phase of the grating was black, identical to the background (luminance,  $L_{\text{dark}} = 1.32 \text{ cd/m}^2$ ), and the bright  
88 phase was varied between 1.73 cd/m<sup>2</sup> and 130 cd/m<sup>2</sup> depending on the tasks (see below). –The size of the  
89 stimulus was also varied depending on the task, ranging from 60 pixels x 60 pixels to 108 pixels x 108  
90 pixels, which subtended 25-45 visual degrees at a viewing distance of 2 cm from the screen (Fig. 1-1A).

91

92 **Experimental procedure and behavioral training.** Each mouse was run for one 30 min behavioral session  
93 per day, with each session yielding 80-180 trials. Each trial in a session was initiated by the mouse touching  
94 the zeroing cross. Upon trial initiation, the cross vanished, and the visual stimulus (or stimuli) were  
95 immediately presented (except in the delay task), for a duration of 0.1-3s depending on the task (see below).  
96 Mice were trained to report the orientation of target grating, by nose-touching the correct response aperture  
97 (vertical  $\rightarrow$  left; horizontal  $\rightarrow$  right). A correct response triggered a tone (600 Hz, 1 sec), the magazine light  
98 turning on, and the delivery of 10 $\mu$ L of water. When mice turned to consumed the reward, their head entry  
99 into the reward port was detected by an infrared sensor which caused the zeroing cross (for the next trial)  
100 to be presented again. An incorrect response triggered a 5-s timeout, during which the house light and the  
101 magazine light were both on and zeroing cross was unavailable for the next trial to be initiated. A failure to

102 respond within 3s (starting stimulus presentation) resulted in a trial reset: the stimulus vanished and the  
103 zeroing cross was presented immediately (without a timeout penalty), to allow initiation of the next trial.  
104 Well-trained animals failed to respond on fewer than 5% of the total number of trials, and there were no  
105 systematic differences in the proportion of such missed trials between different conditions. Within each  
106 daily 30-minute behavioral session, mice consumed approximately 1mL of water. If a mouse failed to  
107 collect enough water from the behavioral session, they were provided with a water supplement using a  
108 small plastic dish in their home cage.

109  
110 **Single-stimulus discrimination task.** Upon trial initiation, a single grating stimulus (i.e., the ‘target’) was  
111 presented above the central aperture, at the same horizontal level as the left and right apertures, and mice  
112 were required to report its orientation with the appropriate nose-touch (Fig. 1B). When stimulus size and  
113 luminance were manipulated (Fig. 1, and 2), three different sizes were tested: 60x60, 84x84, 108x108  
114 (pixels x pixels). For each size, seven different levels of luminance were tested: 2.00, 2.59, 4.37, 7.55, 16.2,  
115 34.3, 130 cd/m<sup>2</sup>. (These corresponded nominally to Michelson’s contrasts of 20%, 32%, 54%, 70%, 85%,  
116 93%, 98%, respectively; Michelson’s contrast is computed as  $(\text{luminance}_{\text{bright}} - \text{luminance}_{\text{dark}}) /$   
117  $(\text{luminance}_{\text{bright}} + \text{luminance}_{\text{dark}}) * 100$ .) Trials with different stimulus luminance at a particular size were  
118 interleaved randomly throughout a session, while trials with different stimulus sizes were examined on  
119 different days. When the stimulus duration was manipulated (Fig. 3), the luminance (130 cd/m<sup>2</sup>) and size  
120 (60 pix x 60 pix) of the grating were fixed, and eleven different stimulus durations were tested: 100 ms,  
121 200, 300, 400, 500, 600, 800, 1000, 1500, 2000, 3000 ms. The stimulus duration was fixed for a given day,  
122 and across days, was varied in a descending sequence from 3000 ms to 100 ms. When the stimulus onset  
123 delay was manipulated (Fig. 5), the luminance (130 cd/m<sup>2</sup>), size (60 pix x 60 pix), and duration (600 ms)  
124 of the grating were fixed. Three different delays were tested: 0, 100, and 200 ms. The delay duration was  
125 fixed for a given day, and varied in an ascending sequence from 0 ms to 200 ms.

126  
127 **Flanker task.** Upon trial initiation, either one stimulus (‘target’, 60 pix x 60 pix, luminance = 20.1 cd/m<sup>2</sup>,  
128 Michelson’s contrast=88%) was presented at the lower location, or two stimuli were presented  
129 simultaneously, with the target at the lower location and a second ‘flanker’ at the upper location (Fig.4A).  
130 Flankers were of the same size (60 pix x 60 pix) and spatial frequency (24 pixel/cycle) as the target, but  
131 with luminance ranging (over 8 levels) from less than that of the target to greater than that of the target [24].  
132 The orientation of the flanker was either identical to that of the target (‘congruent trial’) or orthogonal to  
133 that of the target (‘incongruent trial’). The stimulus (stimuli) was (were) presented for a duration of 1s, and  
134 mice were required to report orientation of the target grating with the appropriate nose-touch (within 3s).  
135 All types of trials (no flanker, congruent, incongruent) and flanker contrasts were interleaved randomly  
136 within each daily session. Data from this experiment have been reported previously [24], and were re-  
137 analyzed here using different analyses.

138  
139 **Subject inclusion/exclusion.** A total of 37 mice were used in this study, with different subsets used in  
140 different tasks. For mice involved in more than one task, they were well-rested for 3-8 weeks with food and  
141 water *ad libitum* between experiments. Before the start of each experiment, all mice were given a few days  
142 of practice session to ensure that they remembered/re-learned the association between the orientation of  
143 single target and the appropriate nose-touch. Of the total of 37 mice trained across tasks, 28 mice passed  
144 the inclusion threshold of response accuracy >70% in the single stimulus discrimination task, and were  
145 included for the analyses reported in this paper.

146  
147 **Trial inclusion/exclusion.** Mice were observed to become less engaged in the task towards the end of a  
148 behavioral session, when they had received a sizeable proportion of their daily water intake. This was  
149 reflected in their behavioral metrics: they tended to wait longer to initiate the next trial, and their  
150 performance deteriorated. We identified and excluded such trials following a published procedure [24], in  
151 order to minimize confounds arising from loss of motivation towards the end of sessions. Briefly, we pooled  
152 data across all mice and all sessions, treating them as coming from one session of a single ‘mouse’. We

153 then binned the data by trial number within the session, computed the discrimination accuracy in each bin  
154 (% correct), and plotted it as a function of trial number within session (Fig. 1-1B, 3-1A, 5-1A). Using a  
155 bootstrapping approach, we computed the 95% confidence interval for this value. We used the following  
156 exclusion criterion: Trials  $q$  and above were dropped if the  $q^{\text{th}}$  trial was the first trial at which *at least one*  
157 of the following two conditions was satisfied: (a) the performance was statistically indistinguishable from  
158 chance on the  $q^{\text{th}}$  trial and for the majority (3/5) of the next 5 trials (including the  $q^{\text{th}}$ ), (b) the number of  
159 observations in  $q^{\text{th}}$  trial was below 25% of the maximum possible number of observations for each trial ( $\Sigma$   
160 mice\*sessions), thereby signaling substantially reduced statistical power available to reliably compare  
161 performance to chance. The plots of performance as a function of trial number, and number of observations  
162 as a function of trial number for the different tasks in this study are shown in Figs. 1-1B, 3-1A, 5-1A, along  
163 with the identified cut-off trial numbers ( $q$ ).  
164

165 **Behavioral measurements:** Response accuracy (% correct) was calculated as the number of correct trials  
166 divided by the total number of trials responded (correct plus incorrect). Reaction time (RT) was defined as  
167 the time between the start of stimulus presentation and time of response nose-touch, both detected by the  
168 touchscreen. In the experiment involving stimulus onset delays (Fig. 5A), RT was computed with respect  
169 to trial initiation (as opposed to from stimulus onset).  
170

171 **Drift diffusion modeling of RT distributions.** The RT measured here represents the duration from  
172 stimulus onset to completion of execution of the motor response. In order to specifically isolate the time  
173 spent in decision making (separately from the latency of activation of sensory neurons as well as duration  
174 of motor execution), we applied the drift-diffusion model to our RT data [40, 41]. This model hypothesizes  
175 that a subject ('decision maker') collects information from the sensory stimulus via sequential sampling,  
176 causing sensory evidence to accrue for or against a particular option (usually binary) while viewing the  
177 stimulus. A decision is to be made when the accumulating evidence reaches an internal threshold of the  
178 subject. This process of evidence accumulation, together with the processes of sensory encoding and motor  
179 execution, as well as threshold crossing, determine the RT observed on each trial.

180 We used a standard version of the model that consists of four independent variables [38, 42]: (1) the drift  
181 rate, (2) the boundary separation, (3) the starting point, and a (4) non-decisional constant ( $t_{\text{delay}}$ ), which  
182 accounts for the time spent in sensory encoding and motor execution. In the case of our tasks, there was no  
183 reason for the drift rate to be different between vertical versus horizontal gratings, and therefore, we merged  
184 both type of trials (trials with a horizontal target grating and trials with a vertical target grating). We treated  
185 'correct' response and 'incorrect' response as the two binary options, and fit the diffusion model to the RT  
186 distributions of correct versus incorrect trials using the fast-dm-30 toolbox with the maximum likelihood  
187 option to gain estimates of those four parameters for each individual mouse (Fig. 2-2)[40].  
188

189 **Conditional accuracy analysis.** Conditional accuracy was calculated as the percentage of correct trials  
190 (accuracy) as a function of RT. For this analysis, trials from all mice were pooled together and treated as if  
191 they were from one single mouse for statistical power (Fig. 2 onwards; for completeness, conditional  
192 accuracy plots using non-pooled data, i.e., from individual mice, are included in Extended Figures). Pooled  
193 trials were then sorted by their RT, and then binned by RT such that there were: (1) sufficient number of  
194 trials in each bin; and (2) sufficient number of total bins, to ensure the robustness of curve fitting and  
195 therefore the estimates of quantitative metrics (see below). Typical bin sizes used were 50ms, 100 ms or  
196 200 ms bins, depending on the experiments and stage of analysis (sensory encoding or STM-dependent).  
197 The effect of bin size on the estimates of quantitative metrics is explored in the Extended Figures; results  
198 show that the estimates are comparable across tested bin sizes.  
199

200 **Conditional accuracy function (CAF).** To quantitatively describe the relationship between the conditional accuracy  
201 and RT, we fitted the plot of accuracy against binned RT with parametric functions (the CAF; see below) using a  
202 nonlinear least square method For RT bins aligned to stimulus onset (Fig. 2, 4C, 5B), we fit the conditional  
203 accuracy data using an increasing asymptotic function:



204  
205  
206  
207  
208  
209  
210  
211  
212  
213  
214  
215  
216  
217  
218  
219  
220  
221  
222  
223  
224  
225  
226  
227  
228  
229  
230  
231  
232  
233  
234  
235  
236  
237  
238  
239  
240  
241  
242  
243  
244  
245  
246  
247  
248  
249  
250  
251  
252  
253  
254

$$\text{Conditional accuracy} = \lambda (1 - e^{-\gamma_{enc} (RT-\delta)}).$$

Three key metrics were defined for this sensory encoding phase, for use in subsequent comparisons across conditions: (1) peak conditional accuracy ( $a_{peak}$ ), the maximal level of accuracy that the CAF reaches within the range of RT; (2) the slope parameter ( $\gamma_{enc}$ ); and (3) the first instant at which the conditional accuracy reaches its maximal value ( $t_{peak}$ ) - defined as the time point at which the ascending CAF reaches 95% of  $a_{peak}$ . Note that  $t_{peak}$  is influenced by the peak conditional accuracy ( $a_{peak}$ ), the slope parameter,  $\gamma_{enc}$ , and the temporal offset at chance performance,  $\delta$ . For RT bins aligned to stimulus offset (Fig. 3C, 4E, 5D), we fit the decaying conditional accuracy data using a sigmoidal function:

$$\text{Conditional accuracy} = \lambda [1/(1 + e^{-\beta_{dec} (RT- \tau)})]+50$$

Three key metrics were defined for this STM-dependent stage for use in subsequent comparisons across conditions: (1) peak conditional accuracy ( $a_{peak}$ ), the maximal level of accuracy within the range of RT; (2) the first instant ( $t_{decay}$ ) at which conditional accuracy is lower than the maximum - defined as the time point at which the descending CAF crosses 95% of  $a_{peak}$ ; and (3) the first instant ( $t_{chance}$ ) at which conditional accuracy drops to chance levels - defined as the timepoint at which the descending CAF crosses 52.5%. In (rare) cases when the CAF never went below 52.5%,  $t_{chance}$  was set to be the upper bound of the window of analysis (i.e., 3000ms – stimulus duration = the window for which the mice can respond following stimulus offset). Note that  $t_{decay}$  and  $t_{chance}$  are influenced by both the slope parameter,  $\beta_{dec}$ , and  $\tau$ .

Confidence intervals of the CAF fits, as well as for the parameters, were estimated by standard bootstrapping procedures involving resampling the raw data randomly with replacement (1000 x), to get repeated estimates of the CAF and corresponding metrics. In all relevant figures, the box plots of the estimated values of each metric show the median (the central mark), the 25th and 75th percentiles (the bottom and top edge of the box), and the most extreme data points not considered as outliers (whiskers).

In the experiment in which the stimulus onset delay was manipulated (Fig. 5), we adopted the following two adjustments to our procedure for the analysis of the conditional accuracy function. First, since the stimulus was short (600 ms), in order to ensure robust estimates of CAF metrics for the sensory encoding stage, we included data beyond stimulus offset as well for the fitting of the CAF through 400 ms following offset. (We chose to include data upto 400 ms after offset, specifically, because we had learned from Figure 3 that conditional accuracy remains at its plateau for nearly 500 ms following stimulus offset.) Second, we also excluded trials with RT < 200ms for the fitting of the CAF (Fig. 5B), because these represent trials on which responses were initiated prematurely (200 ms represents our estimate of the duration of sensory latency plus motor execution; see text surrounding Figure 2).

**Statistical tests.** All analyses and statistical tests were performed in MATLAB. For single-stimulus experiments in which only one stimulus parameter was systemically varied, one-way ANOVA was applied to examine the effect of the manipulating the single factor (duration and delay, Fig. 3AB, 5A, 1-1CD). For experiments that involved changing both stimulus size and contrast (Fig. 1CDE, 2-2), two-way ANOVA was applied to examine the effect of each factor, as well as their interaction. For the flanker task, the paired-sample t-test was used to examine if the group performance was different between trial types (Fig. 4B).

For the metrics associated with CAF, comparisons were made by measuring the effect size (Hedges'  $g$ ) of the difference between two distributions (Fig. 2BD, 4DF and 5CE). All effect size measurements, including those with ANOVA ( $\eta^2$ ), were calculated following the methods (and source code) of Hentschke and Stüttgen (2011)[43]. Hedges'  $g$  estimates the distance between the two distributions in units of their pooled standard deviation, with larger numbers indicating stronger effects.  $\eta^2$  varies from 0 to 1, with larger values indicating greater ratio of variance explained in the dependent variable by a predictor while controlling the other variables.

## 255 RESULTS

256 In this study, freely behaving mice were trained to perform 2-AFC orientation discrimination in a  
 257 touchscreen-based setup [24, 29](Methods). Briefly, mice were placed in a plexiglass tube within a  
 258 soundproof operant chamber equipped with a touch-sensitive screen at one wall and a reward well at the  
 259 opposite wall (Fig. 1A). A plexiglass sheet with three holes was placed in front of the touchscre-n - the  
 260 holes corresponded to the locations at which mice were allowed to interact with the screen by a nose-touch  
 261 (Fig. 1A). All trials began with a nose-touch on a bright zeroing-cross presented within the lower central  
 262 hole (Fig. 1B). Immediately following nose-touch, an oriented grating (target; bright stimulus on a dark  
 263 background) was presented at the center of the screen. Mice were rewarded if they responded to the  
 264 orientation of the target with an appropriate nose-touch: vertical (horizontal) grating → touch within upper  
 265 left (upper right) hole. Behavioral data were collected from daily sessions that lasted 30 minutes for each  
 266 mouse.  
 267

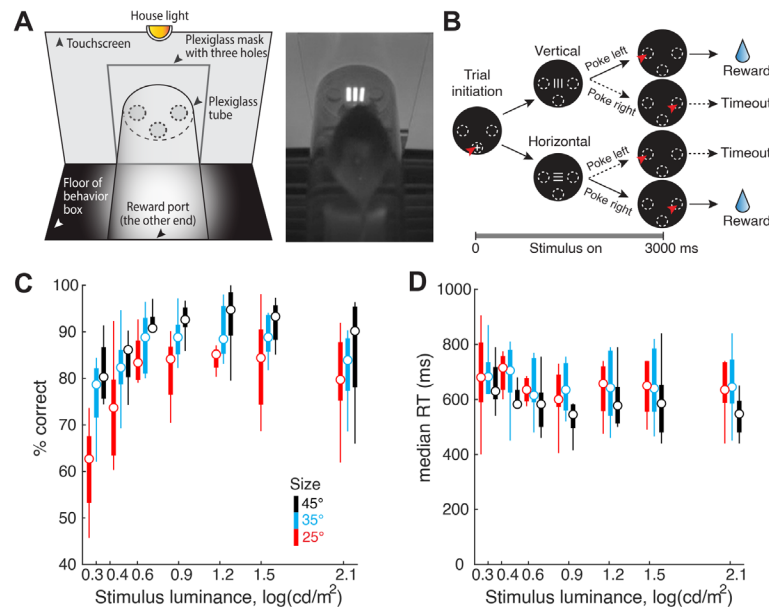

269 **Figure 1. Stimulus contrast and size modulate orientation discrimination performance in freely behaving mice.**  
 270 (A) Left: Schematic of touchscreen-based experimental setup showing key components. Right: Snapshot of freely  
 271 behaving mouse facing a visual stimulus on the touchscreen. (B) Schematic of 2-AFC task design. Black discs:  
 272 Screenshots of touchscreen with visual stimuli; dashed ovals: locations of holes through which mice can interact with  
 273 touchscreen; white '+': zeroing cross presented within central response hole at start of each trial; red arrowhead: nose-  
 274 touch by mouse. Shown also are vertical or horizontal grating stimuli, and reinforcement (water)/punishment (timeout)  
 275 schedule. Bottom: Trial timeline. 0 ms corresponds to the instant at which the mouse touches the zeroing cross (trial  
 276 initiation). Immediately following this, the target grating was presented and stayed on for 3s, or until the mouse  
 277 responded, whichever came first. Vertical and horizontal targets were interleaved randomly. (C) Psychometric plots  
 278 of discrimination accuracy against stimulus luminance (n=8 mice). Different colors correspond to different target sizes.  
 279 2-way ANOVA,  $p < 0.001$  (luminance),  $p < 0.001$  (size),  $p = 0.498$  (interaction). Effect size  $\eta^2 = 0.292$  (luminance),  
 280  $\eta^2 = 0.192$  (size),  $\eta^2 = 0.037$  (interaction). For each stimulus size/luminance, the box plot shows the median (the central  
 281 mark), and the 25<sup>th</sup> and 75<sup>th</sup> percentiles (the bottom and top edge of the box) of the group (n=8). The whiskers extend  
 282 to the most extreme data points not considered as outliers. (D) Plot of median reaction time (RT) against stimulus  
 283 contrast. 2-way ANOVA,  $p = 0.998$  (contrast),  $p = 0.004$  (size),  $p = 1$  (interaction). Effect size  $\eta^2 = 0.003$  (luminance),  
 284  $\eta^2 = 0.071$  (size),  $\eta^2 = 0.010$  (interaction).

285 See also Fig. 1-1.

286

### 287 Stimulus size and luminance modulate mouse discrimination performance

288 We first examined the effect of target size and target contrast on the decision performance of mice in the  
 289 orientation discrimination task. Here, the target grating was presented for up to 3 seconds after trial initiation

290 (Fig.1B; Methods), and its size and luminance were systematically varied; the spatial frequency was fixed  
291 at 0.1 cycles/degree (24 pixels/cycle) [16, 17] (Methods). Mice were allowed to respond at any time during  
292 stimulus presentation, and the stimulus was terminated automatically upon response.

293  
294 We found that both the target contrast and size significantly modulated discrimination accuracy (Fig. 1C,  
295 2-way ANOVA, main effect of luminance,  $p < 0.001$ , effect size  $\eta^2 = 0.292$ ; main effect of size,  $p < 0.001$ ,  
296  $\eta^2 = 0.192$ ; interaction,  $p = 0.498$ ,  $\eta^2 = 0.037$ ). These results revealed that mice discriminated target orientation  
297 better than chance even at the lowest luminance (2.00 cd/m<sup>2</sup>) and size (25°) tested (Fig. 1C; the red box at  
298 the left lower corner,  $p = 0.015$ ,  $t$ -test against mean accuracy=50%, effect size  $g = 1.129$ ). Additionally, at  
299 this smallest target size (25°), mice could discriminate with >80% accuracy for most of the tested luminance  
300 values ( $\geq 4.37$  cd/m<sup>2</sup>; Fig. 1CD, red data).

301  
302 The effect of these parameters on median reaction times (RTs) was less pronounced. Target size, but not  
303 contrast, modulated reaction times (RTs) (Fig.1E, two-way ANOVA; main effect of size,  $p = 0.004$ , effect  
304 size  $\eta^2 = 0.071$ ; main effect of luminance,  $p = 0.998$ ,  $\eta^2 = 0.003$ ; interaction,  $p = 1$ ,  $\eta^2 = 0.010$ ). Together, these  
305 results revealed a systematic effect of target size and luminance on discrimination accuracy.

306  
307  
308 **Effect of stimulus size and contrast on dynamics of visual decision-making: the sensory encoding**  
309 **stage**

310 To investigate the dynamics of visual perceptual decision-making, we adapted approaches from human  
311 studies and examined the dependence of response accuracy on RT, i.e., the so-called ‘conditional accuracy’  
312 function (CAF) [9-11]. For these analyses, we pooled trials from all mice ( $n = 8$ ) in order to gain better  
313 statistical power for the estimates of parameters of the CAF (Methods; plots of the data for individual mice  
314 showed similar overall shapes of the CAF; Fig.2-1A).

315  
316 Specifically, we investigated the dynamics of visual perceptual decision-making as a function of stimulus  
317 size, and separately, as a function of stimulus luminance. First, to examine the effect of stimulus size on  
318 decision dynamics, we pooled trials from all mice across luminance values (7 luminance values) for each  
319 stimulus size, sorted them based on RT, and plotted conditional accuracy for each RT bin (100ms; Fig. 2A;  
320 Methods). We found that for responses with RT less than ~500 ms, conditional accuracy improved for  
321 longer RT, consistent with the classic ‘speed-accuracy tradeoff’ [34]. For responses with RT greater than  
322 500 ms and up to 3s, the allowed duration for responses, conditional accuracy plateaued, and was  
323 independent of RT. Next, to examine the effect of stimulus luminance on decision dynamics, we pooled  
324 trials from all mice across size values into two groups based on stimulus luminance: (1) trials with target  
325 luminance  $\leq 4.37$  cd/m<sup>2</sup> (‘low luminance’), and (2) trials with target luminance  $> 4.37$  cd/m<sup>2</sup> (‘high  
326 luminance’; Methods). Here, as well, we found a similar initial stage of increasing conditional accuracy  
327 upto RT of ~ 500 ms, followed by a plateauing of conditional accuracy.

328  
329 Drawing upon arguments from human behavioral studies, we reasoned that the initial transient stage of the  
330 conditional accuracy function reflects the process of sensory encoding: during it, slower responses allow  
331 more sensory evidence to be acquired, thereby improving conditional accuracy up to a peak value reflecting  
332 the completion of sensory encoding [30-33].

333  
334 To quantify these dynamics, we fit the conditional accuracy data with an asymptotic function (Fig. 2AC,  
335 solid curves) [9-11], and estimated three key metrics, in each case: (1) the peak conditional accuracy ( $a_{peak}$ ),  
336 (2) the slope parameter ( $\gamma_{enc}$ ), and (3) the timepoint at which conditional accuracy reached its peak ( $t_{peak}$ ;  
337 Methods).

338  
339 We found that the peak conditional accuracy was significantly modulated by stimulus size (Fig.2B-left;  
340  $a_{peak}$ : size 25°, median [C.I.] = 81.3 [79.1, 83.7] %; size 35° = 88.0 [86.5, 89.4] %; size 45° = 92.4 [90.7,

341 94.1] %; effect size Hedge's  $g = -6.71$  ( $25^\circ$ - $35^\circ$ ),  $-5.39$  ( $35^\circ$ - $45^\circ$ ),  $-10.6$  ( $25^\circ$ - $45^\circ$ ), but not the slope of the  
342 function (slope parameter,  $\gamma_{enc}$ , Fig. 2B-middle, size  $25^\circ = 6.52$  [5.10, 9.07] a.u.; size  $35^\circ = 8.81$  [7.09,  
343 10.6] a.u.; size  $45^\circ = 7.92$  [6.15, 10.1] a.u. Hedges'  $g = -2.24$  ( $25^\circ$ - $35^\circ$ ),  $0.863$  ( $35^\circ$ - $45^\circ$ ),  $-1.34$  ( $25^\circ$ - $45^\circ$ )),  
344 or the time to reach peak accuracy ( $t_{peak}$ , Fig. 2B-right, size  $25^\circ = 493$  [375, 597] ms; size  $35^\circ = 459$  [420,  
345 505] ms, size  $45^\circ = 466$  [420, 522] ms; Hedges'  $g = 0.728$  ( $25^\circ$ - $35^\circ$ ),  $-0.274$  ( $35^\circ$ - $45^\circ$ ),  $0.558$  ( $25^\circ$ - $45^\circ$ )).  
346

347 Next, we found that the peak conditional accuracy was higher in high-luminance trials (Fig. 2D-left, low-  
348 luminance, median [C.I.] =  $84.7$  [82.7, 86.3] %; high-luminance =  $89.5$  [88.2, 90.7] %, effect size Hedges'  
349  $g = -6.13$ ). The slope was also higher in high-luminance trials (slope parameter,  $\gamma_{enc}$ , Fig. 2D-middle, low-  
350 luminance =  $6.37$  [5.21, 7.78] a.u.; high-luminance =  $10.32$  [8.49, 12.6] a.u., Hedges'  $g = -4.51$ ) suggesting  
351 a faster rate of sensory encoding in high-luminance trials. Consistent with this, the time to reach peak  
352 accuracy was shorter in high-luminance trials (Fig. 2D-right;  $t_{peak}$ : low-luminance =  $531$  [478, 599] ms; high-  
353 contrast =  $412$  [378, 448] ms, Hedges'  $g = 4.86$ ).  
354

355 The RT measured here represents the duration from the start of the sensory input to the completion of  
356 execution of the motor response. In order to obtain an estimate of the duration, specifically, of decision-  
357 making, we employed the standard drift diffusion modeling (DDM) approach [38, 42] (Methods).  
358 Briefly, the DDM analyzes the full RT distribution and yields a quantitative estimate of four parameters  
359 (Methods), one of which is  $t_{delay}$ , a parameter which accounts for the combination of: (a) the time taken for  
360 the sensory (visual) periphery to transduce and relay information to visual brain areas (i.e., neural response  
361 latency), as well as (b) the time taken for executing the motor response (i.e., motor execution delay). In our  
362 tasks, the latter corresponds to the time for the mouse to move its head (and body) to achieve the appropriate  
363 nose-touch.  
364

365 Using this approach, we found that stimulus size as well as luminance had no discernable effect on  $t_{delay}$   
366 (Fig. 2-2. 2-way ANOVA, size:  $p = 0.308$ , luminance:  $p = 0.523$ ; interaction:  $p = 0.931$ ), and the average value  
367 of  $t_{delay}$  was 212 ms. Consequently, we estimated the duration of just the sensory encoding stage (temporal  
368 integration window) as  $t_{peak} - t_{delay} = t_{peak} - 212$  ms. Across conditions, this took values of 200 ms (412 ms  
369 -212 ms; high luminance), 254 ms (466-212 ms; size of 45 deg), 247 ms (459-212 ms; size of 35 deg),  
370 281 ms (493-212 ms; size of 25 deg), and 319 ms (531 ms -212 ms, low luminance).  
371

372 Thus, conditional accuracy analysis allowed us to quantify the sensory encoding stage in mouse visual  
373 perceptual dynamics. We estimated its duration to be brief, varying between 200 ms and 320 ms across the  
374 tested conditions.  
375

376 Following the completion of sensory encoding, a fully constructed representation of the sensory stimulus  
377 is available, as a result of which, additional sampling of the stimulus brings no extra benefits to the  
378 performance. Our finding that RTs longer than  $t_{peak}$  produce no further increase in conditional accuracy, is  
379 consistent with the view (Fig. 2AC).  
380  
381



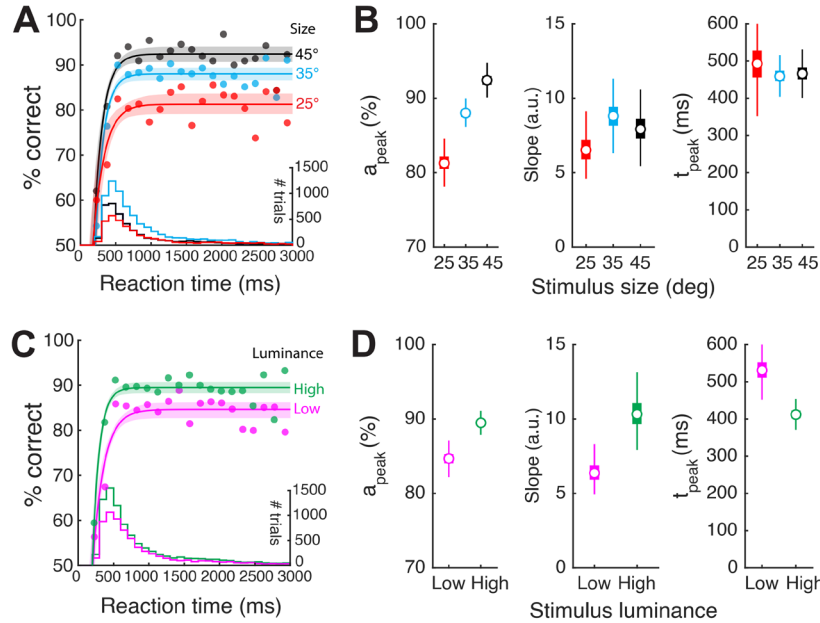

383 **Figure 2. Stimulus size and luminance modulate the sensory encoding stage of the conditional accuracy function**  
384 **(CAF).** (A) Plot of accuracy as a function of RT bins (conditional accuracy) using same dataset as Fig. 1. Data pooled  
385 across all stimulus luminance and mice ( $n=8$ ), sorted by stimulus size; RT bin size = 100 ms. Solid curves: Conditional  
386 accuracy functions (CAFs, best-fit rising asymptotic function; Methods) for targets of different sizes (black: 45°; blue:  
387 35°; red: 25°); light shading: 95% CI of the fit (Methods). Histograms at bottom: RT distributions for targets of  
388 different sizes (y-axis on the right). The overall response accuracy for a particular stimulus condition is the dot product  
389 of the CAF and the RT distribution. (B) Box plots of the key parameters for different target sizes. Left panel:  $a_{\text{peak}}$ ;  
390 middle panel: slope parameter; right panel:  $t_{\text{peak}}$ . (C) CAFs for targets of different luminance conditions (magenta:  
391 'low' luminance - first three luminance levels from Fig. 1C; green: 'high' luminance - last four luminance levels;  
392 Methods); conventions as in A. (D) Box plots of the key parameters for different luminance conditions; conventions  
393 as in C. The box plots in all panels show the median (open circle), the 25th and 75th percentiles (the bottom and top  
394 edge of the box), and the most extreme data points not considered as outliers (whiskers); in some panels, the boxes  
395 are the same size as the symbol for the median.

396 See also Fig. 2-1, 2-2.

397  
398

### 399 Stimulus duration and the dynamics of visual decision-making: the memory-dependent stage

400 The next stage in the time course of perceptual decisions has been identified in human studies as the so-  
401 called 'short-term memory' (STM)-dependent stage, during which an internal representation of the sensory  
402 stimulus is available transiently in memory for guiding behavior [44]. Studies have demonstrated the STM  
403 to be labile such that once the stimulus is terminated, sensory information maintained in STM decays and  
404 is lost (over seconds) [45-49].

405

406 In our experiments so far, the target stimulus was present on the screen for the full duration of the response  
407 window (3s). Here, in order to investigate and quantify the STM-dependent stage of mouse perceptual  
408 decisions, we performed an experiment in which we shortened the stimulus duration systematically from  
409 3s to 100 ms. This allowed us to examine the time course of decision behavior following stimulus offset,  
410 and, as well, to examine the shortest stimulus that mice are able to discriminate effectively.

411

412 We first examined overall mouse behavioral performance at different stimulus durations. We found that  
413 response accuracy was significantly modulated (Fig.3A, one-way ANOVA,  $p<0.001$ , effect size  $\eta^2=0.331$ ),  
414 with accuracy decreasing for shorter stimulus durations (Pearson's  $\rho=0.712$ ,  $p=0.014$ ). There was also a  
415 trend of decreasing median RT for shorter stimulus durations (Fig.3B, one-way ANOVA,  $p=0.056$ , effect

416 size  $\eta^2=0.177$ ; Pearson's  $\rho=0.861$ ,  $p=0.001$ ). Additionally, these results revealed, that the shortest stimulus  
417 duration needed for mice to be able to discriminate above chance was less than 100 ms - the smallest  
418 duration tested (Fig. 3B).  
419  
420

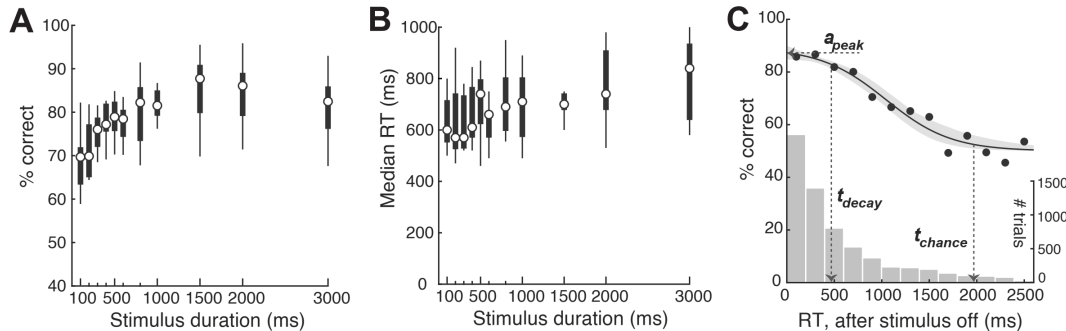

422 **Figure 3. Stimulus duration and the memory-dependent stage of the conditional accuracy function.**  
423 (A) Psychometric plot of discrimination accuracy against stimulus duration ( $n=9$  mice; 1-way ANOVA;  $p<0.001$ .  
424 effect size  $\eta^2=0.331$ ). (B) Plot of median reaction time (RT) against stimulus duration (1-way ANOVA;  $p=0.056$ .  
425 effect size  $\eta^2=0.177$ ). (C) Plot of the conditional accuracy (solid data) as a function of RT bins relative to stimulus  
426 offset. Only trials in which the stimulus was longer than 332 ms were included (in order to ensure full sensory encoding  
427 - see text; Methods). Curve and shading: best-fit sigmoidal function and 95% C.I. Bootstrapped estimates of each key  
428 metric:  $a_{peak}$ , median [C.I.] = 87.3 [84.8, 89.9] %;  $t_{decay} = 469$  [279, 697] ms; and  $t_{chance} = 1969$  [1708, 2520] ms.  
429 Histogram: RT distribution (y axis on the right). In this experiment, stimulus size and luminance were maintained  
430 fixed at  $25^\circ$  and  $130 \text{ cd/m}^2$  respectively.

431 **See also Fig. 3-1.**

432  
433 Next, to examine the decision dynamics following stimulus offset, we aligned trials to stimulus offset, and  
434 computed the conditional accuracy. Considering that incomplete sensory encoding may be a confounding  
435 factor to the STM decay, we only included those trials on which the stimulus was presented for longer than  
436 the duration of the sensory encoding stage, estimated in Figure 2 to be 320 ms.

437  
438 We observed the classic decay in conditional accuracy with longer RTs (Fig. 3C). To quantify the time  
439 course of the decay, we fit the conditional accuracy data with a sigmoidal function (Methods), and estimated  
440 three key metrics (Fig. 3C; Methods). The first, peak performance,  $a_{peak}$ , was 87.3% (median, C.I. = [84.8,  
441 89.9] %), comparable to the asymptotic level of Figure 2, thereby supporting that sensory encoding is,  
442 indeed, complete on these trials. The second, the time point at which the conditional accuracy dropped  
443 below the peak value,  $t_{decay}$ , was 469 ms (median, C.I. = [279, 697] ms) after stimulus offset. The third, the  
444 first timepoint at which the discrimination accuracy dropped to a level indistinguishable from the chance,  
445  $t_{chance}$ , was 1969 ms (median, C.I. = [1708, 2520] ms) after stimulus offset (Methods).

446  
447 Thus, our conditional accuracy analysis allowed us to investigate quantitatively the second, STM-dependent  
448 stage in mouse visual perceptual dynamics. We estimated the duration over which above-chance decision  
449 accuracy is supported in mice after stimulus offset as  $\sim 1700$ ms (i.e.,  $t_{chance}$  minus the  $t_{delay}$ ).  
450

451  
452 **The presence of flanker stimulus modulates perceptual dynamics**

453 We next investigated the impact of sensory context on visual decision dynamics. It is well-established that  
454 the sensory context in which the perceptual target is presented modulates animals' behavior [50-52]. For  
455 instance, in the classic flanker task in humans, the co-occurrence of a flanker stimulus with conflicting  
456 information can interfere with perceptual performance [53, 54]. Recently, similar results were demonstrated  
457 in mice using a touchscreen version of the flanker task [24]. In this task (Fig. 4A), a target grating (always  
458 presented at the lower location) was accompanied by a flanker grating at the upper location with either

459 orthogonal orientation ('incongruent' flanker) or same orientation ('congruent' flanker). Compared to the  
 460 presence of a congruent flanker, the 'incongruent' flanker significantly impaired discrimination accuracy  
 461 (Fig. 4B-left;  $p < 0.001$ , paired-sample  $t$  test. effect size Hedges'  $g = 1.61$ ; re-plotted based on data from [24];  
 462 Methods). Here, we analyzed that dataset with the conditional accuracy analysis to investigate whether an  
 463 incongruent flanker affected the sensory encoding stage or the STM-dependent stage of perceptual  
 464 dynamics.  
 465  
 466

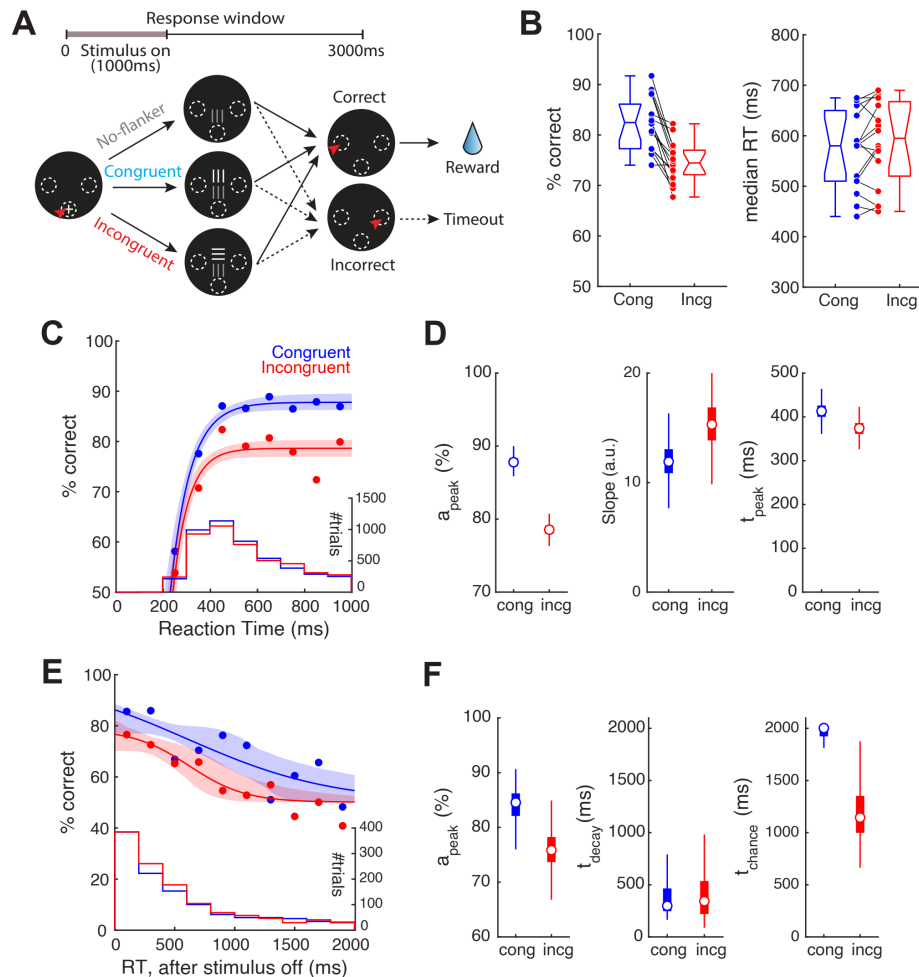

468  
 469 **Figure 4. Incongruent flanker modulates the sensory encoding stage of the conditional accuracy function (CAF).**  
 470 (A) Schematic of the flanker task; target grating is always presented at the lower location; a second 'flanker' grating  
 471 (orthogonal orientation – incongruent flanker, or same orientation – congruent flanker) is presented simultaneously,  
 472 and always at the upper location; contrast of flanker is systematically varied (adapted from [24]). All other  
 473 conventions as in Figure 1. The stimuli were presented for 1s and the response window was 3s. (B) Left panel:  
 474 Comparison of performance between trials with incongruent vs. congruent flanker.  $p < 0.001$ , paired-sample  $t$  test.  
 475 effect size Hedges'  $g = 1.61$ . Right panel: Comparison of median RT between trials with incongruent vs. congruent  
 476 flanker.  $p = 0.137$ , paired-sample  $t$  test. effect size Hedges'  $g = -0.176$ . Data re-analyzed from You et al [24]; each line  
 477 represents data from one mouse ( $n = 17$  mice). Data in B-F include only trials with high flanker luminance ( $\geq 20.1$  cd/m<sup>2</sup>;  
 478 see text). (C) CAFs of the sensory encoding stage; Blue: trials with congruent flanker; red: trials with incongruent  
 479 flanker; histograms; RT distributions. (D) Key parameters of CAFs (sensory encoding stage) for trials with congruent  
 480 vs. incongruent flanker;  $a_{\text{peak}}$  (left), slope parameter (middle), and  $t_{\text{peak}}$  (right). Box plots show the distribution of  
 481 bootstrapped estimates (Methods). Effect sizes (congruent – incongruent):  $a_{\text{peak}}$ : Hedges'  $g = 11.0$ ; slope parameter:  
 482 Hedges'  $g = -1.73$ ;  $t_{\text{peak}}$ : Hedges'  $g = 2.08$ . Note, the sizes of the boxes in the left and right panels are similar to the sizes

483 of the circular symbols depicting the medians. **(E)** CAFs of the STM-dependent stage; data aligned to stimulus offset.  
484 Blue: trials with congruent flanker; red: trials with incongruent flanker. **(F)** Plots of key parameters of CAFs (STM-  
485 dependent stage) for trials with congruent vs. incongruent flanker;  $a_{peak}$  (left),  $t_{chance}$  (middle) and  $t_{decay}$  (right).  
486 Conventions and statistical methods as in D.  $a_{peak}$ : Hedges'  $g=2.54$ ;  $t_{chance}$ : Hedges'  $g=2.98$ ;  $t_{decay}$ : Hedges'  $g=0.175$ .

487  
488 To investigate the effect of the flanker on perceptual dynamics, we pooled trials from all mice into two  
489 groups based on their flanker congruency, and sorted the trials based on their RT. Since previous study [24]  
490 has demonstrated that the flanker affects performance significantly only when its luminance is higher than  
491 (or equal to) that of the target, here we included only high-luminance trials (trials with flanker luminance  
492  $\geq 20.1$  cd/m<sup>2</sup>). To examine the sensory encoding stage quantitatively, we followed the approach used in  
493 Figure 2 and selected the trials on which mice responded before the stimulus ended (RT < 1000ms), and  
494 aligned them to stimulus onset. Separately, to examine the STM-dependent stage, we followed the approach  
495 used in Figure 3 and selected the trials on which responses were made after the stimulus ended, and aligned  
496 them to stimulus offset.

497  
498 The sensory encoding stage was significantly modulated by flanker congruency (Fig. 4CD). We found that ,  
499 the peak conditional accuracy for incongruent trials was significantly lower than that of congruent trials  
500 (Fig. 4D-left;  $a_{peak}$ : congruent, median [C.I.] = 87.8 [86.3, 89.6] %, incongruent = 78.5 [76.9, 80.2] %; effect  
501 size (congruent-incongruent) Hedges'  $g=11.0$ ), indicating that the presence of a high-luminance  
502 incongruent flanker interfered with the sensory encoding of the target stimulus. While the slope parameter  
503 for incongruent trials remains comparable to that of the congruent trials (Fig. 4D middle; congruent = 11.9  
504 [9.10, 15.5] a.u., incongruent = 15.3 [11.6, 20.6] a.u.; Hedges'  $g=-1.73$ ), the time to reach peak accuracy  
505 was, however, shorter for incongruent trials (Fig. 4D-right;  $t_{peak}$ : congruent = 413 [378, 458] ms,  
506 incongruent = 374 [340, 410] ms; Hedges'  $g=2.08$ ), consistent with the lower  $a_{peak}$  (Fig. 4D-left).

507  
508 The STM-dependent stage also appeared to be modulated by flanker congruency (Fig. 4EF). Following  
509 stimulus offset, the time at which conditional accuracy dropped to chance was much earlier in incongruent  
510 trials than in congruent trials (Fig. 4F-right;  $t_{chance}$ : congruent, median [C.I.] = 2000 [1363, 2000] ms;  
511 incongruent = 1145 [816, 1985] ms; Hedges'  $g=2.98$ ). However, this was likely due largely to the lower  
512 peak conditional accuracy for incongruent trials (Fig.4F-left;  $a_{peak}$ : congruent= 84.5 [76.9, 88.6] %;  
513 incongruent = 75.9 [70.1, 82.1] %; Hedges'  $g=2.54$ ), as opposed to changes in  $t_{decay}$  (Fig. 4F-middle;  
514 congruent= 299 [197, 1086] ms; incongruent= 343 [126, 802] ms; Hedges'  $g=0.175$ ), or to the rate of decay  
515 (slope parameter; data not shown, congruent= -1.82 [-10, -1.0] a.u., incongruent= -4.82 [-10.0, -1.60] a.u.;  
516 Hedges'  $g=0.99$ ).

517  
518 In sum, we found that the presence of an incongruent flanker interferes the sensory encoding stage but not  
519 the STM-dependent stage of mouse visual decision dynamics.

520  
521

### 522 **Stimulus onset delay modulates RT distribution but not the conditional accuracy function**

523 The components of behavioral performance that we have investigated thus far, namely, overall decision  
524 accuracy, RT distribution and conditional accuracy function are related formally in the following way: the  
525 overall decision accuracy is the dot product of the conditional accuracy function and RT distribution.

526  
527 Our manipulations, thus far, produced changes in the conditional accuracy function predominantly. Here,  
528 we wondered whether task parameters could, instead, alter RT distribution, and possibly do so without  
529 affecting the conditional accuracy function. To test this, we added a delay between trial initiation and target  
530 onset (called stimulus onset delay) in the single stimulus discrimination task. We reasoned that the extent  
531 to which mice are unable to adaptively withhold responding could impact the RT distribution.

532



533 We found that adding a stimulus onset delay did alter the RT distribution of mice (Fig. 5A-upper panel).  
 534 The median RTs, measured relative to trial initiation, showed an increasing trend with delay (one-way  
 535 ANOVA,  $p=0.094$ ; effect size  $\eta^2=0.179$ ; Pearson's correlation= $0.422$ ,  $p=0.028$ ). This indicated that mice  
 536 were able to sense the delayed onset of stimulus and thereby withhold their responses. However, mice were  
 537 unable to withhold responding for the full duration required. By performing a linear regression (Fig. 5A-  
 538 upper panel; dashed line), we found that mice were able to withhold their responses for only 39 ms for  
 539 every 100ms of delay. Separately, this increase in RT for longer delays was accompanied by a trend towards  
 540 lower decision accuracy (Fig. 5A-lower panel, one-way ANOVA,  $p=0.182$ ; effect size  $\eta^2=0.132$ ; Pearson's  
 541 correlation= $-0.358$ ,  $p=0.067$ ).

542  
 543 By contrast, conditional accuracy analysis revealed no effect of stimulus onset delay either on the sensory  
 544 encoding stage (Fig. 5BC,  $a_{peak}$ : no-delay, median [C.I.] = 84.2 [82.2, 86.4]%, 200ms-delay = 85.6 [82.9,  
 545 89.2]%, effect size (no-delay - 200ms-delay) Hedges'  $g=-1.12$ ; slope parameter: no-delay = 7.69 [5.82, 10.7]  
 546 a.u., 200ms-delay = 6.61 [4.63, 8.74] a.u., Hedges'  $g=0.264$ ;  $t_{peak}$ : no-delay = 494 [436, 557] ms, 200ms-  
 547 delay = 552 [476, 680] ms, Hedges'  $g=-1.49$ ), or on the STM-dependent stage (Fig. 5DE,  $a_{peak}$ : no-delay,  
 548 median [C.I.] = 80.5 [75.6, 85.5]%, 200ms-delay = 80.9 [75.6, 84.9]%, Hedges'  $g=-0.147$ ;  $t_{decay}$ : no-delay  
 549 = 976 [332, 1642] ms, 200ms-delay = 580 [319, 1585] ms, Hedges'  $g=0.877$ ;  $t_{chance}$ : no-delay = 2214 [1865,  
 550 2400] ms, 200ms-delay = 2400 [1935, 2400] ms, Hedges'  $g=-1.22$ ).

551  
 552 Taken together, our results from varying the stimulus onset delay show that changes in RT distribution  
 553 (and overall decision accuracy) are not necessarily accompanied by changes in the conditional accuracy  
 554 function. The observed trend of decreased accuracy was accounted for by the fact that with a delay, there  
 555 were more responses initiated before the sensory encoding was complete, or even before the stimulus was  
 556 presented (i.e., 'impulsive' responses) (Fig.5B, histograms). To quantify such impulsivity, we propose an  
 557 'impulsivity index' (ImpI):  $ImpI = 1 - \text{average}(\text{duration for which mice withhold responses} / \text{duration of}$   
 558  $\text{the delay})$ . Higher positive values of this index indicate greater impulsivity, with  $ImpI=1$  indicating a  
 559 complete inability to withhold responding in the face of stimulus delays ('maximally' impulsive). In the  
 560 case of our mice,  $ImpI$  is  $\sim 0.6$ .

561  
 562

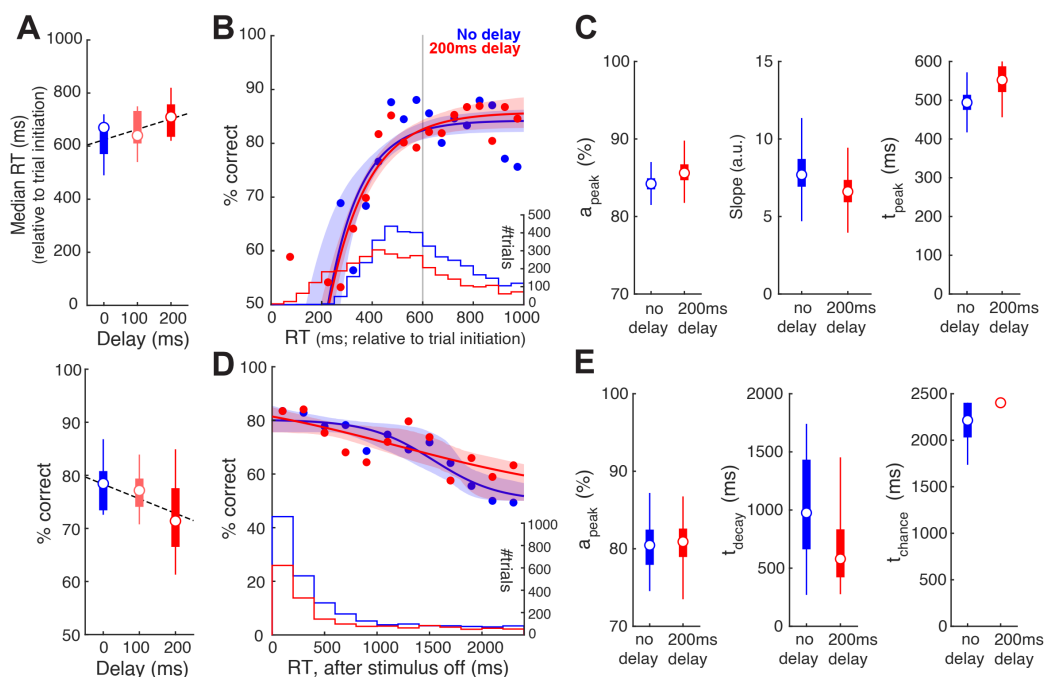

564 **Figure 5. Stimulus onset delay modulates RT distribution but not the conditional accuracy function. (A) *Upper:***  
565 Plot of median RT, measured relative to train initiation, against stimulus onset delay (n=9 mice; p=0.094, 1-way  
566 ANOVA; effect size  $\eta^2=0.179$ ; Pearson's correlation=0.422, p=0.028). Dashed line: Linear regression on RTs. *Lower:*  
567 Plot of response accuracy against stimulus onset delay (p=0.182, 1-way ANOVA; effect size  $\eta^2=0.132$ ; Pearson's  
568 correlation=-0.358, p=0.067). **(B)** Conditional accuracy functions of the sensory encoding stage; Blue: trials with no  
569 delay; red: trials with 200ms delay; shaded bands: bootstrap confidence intervals (95%); confidence intervals overlap  
570 for the two datasets. Histograms: RT distributions. Grey vertical line: stimulus offset. **(C)** Key parameters of the CAF  
571 (sensory encoding stage) for trials with no delay vs. trials with 200ms delay. Box plots show the distribution of the  
572 bootstrapped estimates. **(D)** Conditional accuracy functions of the STM-dependent stage. Conventions as in B. **(E)**  
573 Key parameters of the CAF (STM-dependent stage) for trials with no delay vs. trials with 200ms delay. Conventions  
574 as in C.  
575 See also Fig. 5-1.

576

577

## 578 DISCUSSION

579 In this study, we quantify two distinct stages in the temporal dynamics of visual perceptual decisions in  
580 mice. First, a sensory encoding stage that is subject to the speed-accuracy tradeoff, and then, a short-term  
581 memory dependent stage in which decision performance decays once the stimulus disappears. We also  
582 demonstrate that the conditional accuracy function and the RT distribution can be affected independently  
583 by experimental manipulations. Whereas stimulus size, luminance and presence of a foil modulate the  
584 conditional accuracy function with minimal changes to the RT distribution, stimulus onset asynchrony  
585 modulates the RT distribution without changes to the conditional accuracy function. Additionally, our  
586 results yield numerical estimates of fundamental psychophysical constants of visual perceptual decision-  
587 making in mice. Taken together, this study establishes a quantitative platform for future work dissecting  
588 neural circuit underpinnings of the dynamics of visually guided decision-making in mice.

589

### 590 Estimates of time constants of the dynamics of visual perceptual decision-making in mice

591 Our results yielded numerical estimates of the duration of sensory encoding (i.e., the window of temporal  
592 integration) as 200-320 ms across stimulus size and luminance (Fig. 2). This estimate is similar to that in  
593 humans: the internal representation of a visual stimulus is thought to be constructed within the first 200-  
594 300 ms of stimulus presentation [30-33]

595

596 On the other hand, we also obtained an estimate of the duration of STM as 1700 ms. This constituted the  
597 period starting from stimulus offset to the last instant at which responses that are better than chance were  
598 initiated (Fig. 3D;  $t_{\text{chance}} - t_{\text{delay}} = \sim 1700$  ms). This duration does not necessarily represent just the  
599 maintenance of visual stimulus information in STM, it could also represent maintenance of information  
600 about the motor response associated with the stimulus (and likely, a combination of the two). Notably, our  
601 estimate of the duration of viability of the labile internal representation in mice falls in the same range as  
602 has been reported from human studies [34, 35, 55].

603

604 We have interpreted the decay in performance following stimulus offset as being due to loss of information  
605 in STM. A potential confounding factor to this interpretation is differences in the internal state of the animal  
606 – in selective attention, or more generally, task engagement. It is possible, for instance, that all the trials  
607 with longer RTs represent those in which mice did not pay attention to the stimulus (or more generally,  
608 were disengaged from the task), thereby also being associated with lower accuracy. Indeed, in our flanker  
609 task, we find that disruption of attention interferes with sensory encoding and causes the conditional  
610 accuracy to be lower following stimulus offset (Fig. 4).

611

612 However, unlike in the flanker task, in these trials, attention was not varied systematically, suggesting that  
613 a loss of attention (or more generally, changes in internal state) are unlikely to account systematically for  
614 the late decay of conditional accuracy. (Indeed, if they did, that would predict that with a steady level of  
615 attentiveness or engagement, response accuracy would never decay following stimulus offset, in direct

616 contravention to published literature.) Nonetheless, because it is difficult to quantify the extent to which  
617 changes in internal state may have played a role in our task, we propose that our estimate of the duration of  
618 STM of 1700 ms serves as a *lower bound* for the duration of STM.

619  
620 This estimate of 1700 ms also represents a lower bound for working memory (WM). Whereas STM refers  
621 to the retention of information even when it is not accessible from the environment, WM is thought of as  
622 ‘STM+,’ referring additionally to the ability to manipulate this information and protect it from interference  
623 [56, 57]. WM can be lengthened with training. For instance, in tasks that require animals hold information  
624 over an enforced delay period before responding, it has been reported that mice can learn to perform well  
625 with delay periods up to 5 sec [58]. Here, by allowing the natural evolution of the dynamics of decision-  
626 making to occur without an imposed delay period, we were able to estimate the ‘intrinsic’ (lower bound for  
627 the) duration of STM.

### 628 629 **Estimates of the operating range of stimulus features for visual perceptual decision-making in mice**

630 This study also yielded estimates for the range of values of various stimulus features within which mice are  
631 able to discriminate the visual target. The smallest stimulus and lowest luminance at which mice were able  
632 to discriminate orientation above chance were  $25^\circ$  and  $2.00 \text{ cd/m}^2$ , with mice performing at  $> 80\%$  accuracy  
633 for most luminance values at that smallest size. The shortest stimulus that mice are able to discriminate  
634 above chance was  $\leq 100\text{ms}$  (Fig. 3A). Further, based on the x-intercept of the CAF in sensory encoding  
635 stage (median [C.I.] = 236 [215, 253] ms, pooling all trials of various sizes and luminance from Fig. 2), we  
636 were able to refine this estimate to be  $\leq 53\text{ms}$  (conservatively, after subtracting  $t_{\text{delay}} = \sim 200 \text{ ms}$ ). This is  
637 consistent to the estimation (40-80 ms) from a previous study based on visual cortical activity [59]. In a  
638 subgroup of animals ( $n=3$ ), we tested if mice are able to discriminate orientation of the target stimulus ( $25^\circ$ ,  
639  $0.1 \text{ cpd}$ ,  $16.2 \text{ cd/m}^2$ ) when it was 50 ms long. Two out of the three mice showed a response accuracy higher  
640 than chance (accuracy = 57.9%, 210 correct out of 363 trials,  $p=0.002$ , binomial test; and 55.6%, 143/257,  
641  $p=0.040$ , respectively), consistent with this refined estimate. These findings that mice are able to  
642 discriminate visual stimuli in demanding sensory contexts suggest that the visual perceptual abilities of  
643 mice may be underrated.

644  
645 The best discrimination performance reported in mice (accuracies  $> 90\%$ ) have typically been obtained  
646 using large, often full-field, grating stimuli [18, 60]. In our single target discrimination task, the best  
647 performance ranged lower, between 75-90% (Fig. 1C), consistent with our use of ‘small’ stimuli (relative  
648 to those typically used in mouse vision studies [15, 16, 18, 20, 61]) and the lower visual acuity of mice.  
649 Indeed, in our pilot study, the performance plateaued at  $\sim 93\%$  for a stimulus size  $\geq 45^\circ$  (Fig. 1-1CD). These  
650 results suggest that full-field stimuli may be effectively replaced by  $45^\circ$  stimuli to achieve best performance  
651 levels.

652  
653 The best discrimination performance exhibited a dip at the highest luminance (Fig. 1C). This is potentially  
654 well accounted for by signal saturation: because the visual system adapts to the relevant range of stimulus  
655 luminance for best encoding [62], the interleaved presentation of stimuli with different luminance can  
656 render the maximum-luminance stimulus unfavorable because of signal saturation [18]. Consistent with  
657 this idea, when the maximum-luminance stimulus ( $25^\circ$ ,  $0.1 \text{ cpd}$ ,  $130 \text{ cd/m}^2$ ) was presented *alone* in block  
658 design (Fig. 1-1C, the green box at the left most, group median [C.I.] = 85.7 [77.6, 92.1] %), response  
659 accuracy was nominally higher than when it was presented interleaved with stimuli of varying luminance  
660 (Fig. 1C, the red box at the right most, group median [C.I.] = 79.7 [61.9, 91.9] %). These results indicate  
661 that a good upper bound for stimulus luminance in mouse experiments may be  $\sim 34 \text{ cd/m}^2$ .

### 662 663 **Stimulus and task parameters modulate perceptual performance through a variety of mechanisms**

664 Increase in stimulus size and luminance both improve the discrimination performance of mice (Fig. 1).  
665 However, analysis of conditional accuracy revealed that increasing the stimulus size and luminance both  
666 increased the peak conditional accuracy ( $a_{\text{peak}}$ ), but only increasing the stimulus luminance increased the

667 slope of the CAF and resulted in a shorter  $t_{\text{peak}}$  (Fig. 2). We propose that these differences in the CAF  
668 actually reflect differential mechanisms underlying the processing of stimulus size versus *contrast*, as  
669 opposed to stimulus size versus *luminance*. On the one hand, in our experiments, varying luminance (by  
670 varying the intensity of the bright phase of the grating), also varied stimulus contrast (relative to the dark  
671 background). On the other, increasing stimulus size increased the total luminance while maintaining the  
672 contrast fixed. Consequently, the observed differences in the CAF following manipulations of stimulus size  
673 and luminance are best explained by differential mechanisms for stimulus size versus contrast processing.  
674

675 Separately, manipulating attention (by presenting a flanker) and the stimulus onset asynchrony both caused  
676 a reduction in response accuracy (Fig.4B, 5A-lower panel). However, again, the analysis of conditional  
677 accuracy suggests that the mechanisms underlying the two are different: the capture of attention by the  
678 flanker interferes with the target's sensory encoding, whereas adding a pre-stimulus onset delay results in  
679 change of the RT distribution without affecting the CAF.  
680

681 Taken together, our results demonstrate that although manipulating stimulus parameters or experimental  
682 conditions may induce similar changes in perceptual performance (overall accuracy), their underlying  
683 mechanisms could be very different. The conditional accuracy analysis serves as an informative tool to  
684 investigate these mechanisms in detail and to understand the dynamics of perceptual decision making.  
685

### 686 **Qualitative differences between perceptual decision-making tasks as well as between task-difficulties**

687 Our results, in conjunction with published studies, suggest that qualitatively different visual perceptual  
688 decision-making tasks may produce sensory encoding stages with substantially different time scales.  
689 Across the various tasks and stimulus conditions that we studied here in mice, the sensory encoding stage  
690 ended rapidly around 300 ms, exhibiting an asymptotic relationship between conditional accuracy and  
691 RT. However, in a recent study in which rats discriminated the direction of motion of a patch of randomly  
692 moving dots, the sensory encoding stage continued through 1.5 s (the longest RT bin reported), exhibiting  
693 a linear relationship between conditional accuracy and RT, and pointing to an even longer encoding stage  
694 [63]. We propose that this large difference in the duration of sensory encoding may be due to  
695 fundamentally different natures of the tasks: tasks involving noise and stimulus dynamics (as with the  
696 random dot motion patch) may necessitate longer time windows for sensory integration, compared to  
697 tasks with non-noisy, static stimuli (as with all of our tasks).  
698

699 Our results also highlight that 'task difficulty' may be altered in qualitatively different ways, producing  
700 distinct outcomes on behavior. In the literature, task difficulty is often increased by making target stimuli  
701 noisier, or more ambiguous, or by introducing distracters (which we did also). Such manipulations often  
702 cause subjects (animals) to respond slower, allowing them time to either gather more information to produce  
703 better performance. We found similar results here as well. Additionally, we shortened the stimulus duration,  
704 which can plausibly be considered to also increase task difficulty. However, when we did so, we found the  
705 opposite result – mice responded faster as the target stimulus became shorter (Fig. 3B). This potentially  
706 counter-intuitive effect (faster RTs for a 'more difficult' task) is explained well by the conditional accuracy  
707 analysis (Fig. 3C). Whereas shortening the stimulus duration makes the task more difficult, responding  
708 more slowly to shorter stimuli does not grant a perceptual benefit to the animals: once the stimulus has  
709 disappeared, withholding responses for longer would only increase the risk of losing information owing to  
710 memory decay. In other words, short stimuli impose a 'time pressure' on animals to make decisions quickly.  
711 Thus, task difficulty may be altered in qualitatively different ways, with distinct behavioral effects.  
712

### 713 **Optimal sensory sampling during visual perceptual decision-making in mice**

714 An intriguing observation in our study is that across tasks, the peak of RT distribution always seemed to  
715 occur around  $t_{\text{peak}}$  (Fig. 2AC, 4C). Since the RT distribution can vary independently of the conditional  
716 accuracy function (as demonstrated in Fig. 5), there is no *priori* reason that the peak of RT distribution (or



717 median RT) and the  $t_{\text{peak}}$  must change together. We propose that responding with RTs close to  $t_{\text{peak}}$  is, in  
718 fact, an optimal behavioral strategy for the mice. As indicated by the conditional accuracy function, mouse  
719 response accuracy increased as RT increased until it reached a plateau at  $t_{\text{peak}}$ . Responding earlier than  $t_{\text{peak}}$ ,  
720 therefore, would sacrifice accuracy, while responding later than  $t_{\text{peak}}$  would needlessly delay response  
721 (reducing the reward rate). Consequently, responding with the peak of RT distribution being equal to  $t_{\text{peak}}$   
722 would be optimal.

723

724

## 725 EXTENDED DATA

726 Extended data (Fig. 1-1, 2-1, 2-2, 3-1, and 5-1) and legends are included.

727

728

## 729 REFERENCES

- 730 1. Siegel, M., A.K. Engel, and T.H. Donner, *Cortical network dynamics of perceptual decision-making in the*  
731 *human brain*. *Frontiers in human neuroscience*, 2011. **5**: p. 21.
- 732 2. Stanford, T.R., et al., *Perceptual decision making in less than 30 milliseconds*. *Nature neuroscience*, 2010.  
733 **13**(3): p. 379.
- 734 3. Uchida, N., A. Kepecs, and Z.F. Mainen, *Seeing at a glance, smelling in a whiff: rapid forms of perceptual*  
735 *decision making*. *Nature Reviews Neuroscience*, 2006. **7**(6): p. 485-491.
- 736 4. Wilming, N., et al., *Large-scale dynamics of perceptual decision information across human cortex*. *Nature*  
737 *communications*, 2020. **11**(1): p. 1-14.
- 738 5. Steinemann, N.A., R.G. O'Connell, and S.P. Kelly, *Decisions are expedited through multiple neural*  
739 *adjustments spanning the sensorimotor hierarchy*. *Nature communications*, 2018. **9**(1): p. 1-13.
- 740 6. Thura, D. and P. Cisek, *Deliberation and commitment in the premotor and primary motor cortex during*  
741 *dynamic decision making*. *Neuron*, 2014. **81**(6): p. 1401-1416.
- 742 7. Zariwala, H.A., et al., *The limits of deliberation in a perceptual decision task*. *Neuron*, 2013. **78**(2): p. 339-  
743 51.
- 744 8. Yang, Y., et al., *Millisecond-scale differences in neural activity in auditory cortex can drive decisions*.  
745 *Nature Precedings*, 2008: p. 1-1.
- 746 9. Wickelgren, W.A., *Speed-accuracy tradeoff and information processing dynamics*. *Acta psychologica*,  
747 1977. **41**(1): p. 67-85.
- 748 10. McElree, B. and B.A. Doshier, *Serial position and set size in short-term memory: the time course of*  
749 *recognition*. *Journal of Experimental Psychology: General*, 1989. **118**(4): p. 346.
- 750 11. Heitz, R.P., *The speed-accuracy tradeoff: history, physiology, methodology, and behavior*. *Frontiers in*  
751 *neuroscience*, 2014. **8**: p. 150.
- 752 12. Huberman, A.D. and C.M. Niell, *What can mice tell us about how vision works?* *Trends Neurosci*, 2011.  
753 **34**(9): p. 464-73.
- 754 13. Glickfeld, L.L., R.C. Reid, and M.L. Andermann, *A mouse model of higher visual cortical function*.  
755 *Current opinion in neurobiology*, 2014. **24**: p. 28-33.
- 756 14. Seabrook, T.A., et al., *Architecture, function, and assembly of the mouse visual system*. *Annual review of*  
757 *neuroscience*, 2017. **40**: p. 499-538.
- 758 15. Prusky, G.T., P.W. West, and R.M. Douglas, *Behavioral assessment of visual acuity in mice and rats*.  
759 *Vision Res*, 2000. **40**(16): p. 2201-9.
- 760 16. Prusky, G.T. and R.M. Douglas, *Characterization of mouse cortical spatial vision*. *Vision Res*, 2004.  
761 **44**(28): p. 3411-8.
- 762 17. Histed, M.H., L.A. Carvalho, and J.H. Maunsell, *Psychophysical measurement of contrast sensitivity in the*  
763 *behaving mouse*. *J Neurophysiol*, 2012. **107**(3): p. 758-65.
- 764 18. Long, M., et al., *Contrast-dependent orientation discrimination in the mouse*. *Sci Rep*, 2015. **5**: p. 15830.
- 765 19. Burgess, C.P., et al., *High-Yield Methods for Accurate Two-Alternative Visual Psychophysics in Head-*  
766 *Fixed Mice*. *Cell Rep*, 2017. **20**(10): p. 2513-2524.
- 767 20. Busse, L., et al., *The detection of visual contrast in the behaving mouse*. *J Neurosci*, 2011. **31**(31): p.  
768 11351-61.
- 769 21. Carandini, M. and A.K. Churchland, *Probing perceptual decisions in rodents*. *Nature neuroscience*, 2013.  
770 **16**(7): p. 824.

- 771 22. Glickfeld, L.L., M.H. Histed, and J.H. Maunsell, *Mouse primary visual cortex is used to detect both*  
772 *orientation and contrast changes*. J Neurosci, 2013. **33**(50): p. 19416-22.
- 773 23. Wang, L. and R.J. Krauzlis, *Visual Selective Attention in Mice*. Curr Biol, 2018. **28**(5): p. 676-685.e4.
- 774 24. You, W.-K. and S.P. Mysore, *Endogenous and exogenous control of visuospatial selective attention in*  
775 *freely behaving mice*. Nature Communications, 2020. **11**(1): p. 1-14.
- 776 25. Speed, A., et al., *Spatial attention enhances network, cellular and subthreshold responses in mouse visual*  
777 *cortex*. Nature communications, 2020. **11**(1): p. 1-11.
- 778 26. Umino, Y., R. Pasquale, and E. Solessio, *Visual temporal contrast sensitivity in the behaving mouse shares*  
779 *fundamental properties with human psychophysics*. eNeuro, 2018. **5**(4).
- 780 27. Nomura, Y., et al., *Evaluation of critical flicker-fusion frequency measurement methods using a*  
781 *touchscreen-based visual temporal discrimination task in the behaving mouse*. Neuroscience research,  
782 2019. **148**: p. 28-33.
- 783 28. Histed, M.H. and J.H. Maunsell, *Cortical neural populations can guide behavior by integrating inputs*  
784 *linearly, independent of synchrony*. Proceedings of the National Academy of Sciences, 2014. **111**(1): p.  
785 E178-E187.
- 786 29. Mar, A.C., et al., *The touchscreen operant platform for assessing executive function in rats and mice*. Nat  
787 Protoc, 2013. **8**(10): p. 1985-2005.
- 788 30. Shibuya, H. and C. Bundesen, *Visual selection from multielement displays: measuring and modeling effects*  
789 *of exposure duration*. Journal of Experimental Psychology: Human Perception and Performance, 1988.  
790 **14**(4): p. 591.
- 791 31. Busey, T.A. and G.R. Loftus, *Sensory and cognitive components of visual information acquisition*.  
792 Psychological Review, 1994. **101**(3): p. 446.
- 793 32. Vogel, E.K., G.F. Woodman, and S.J. Luck, *The time course of consolidation in visual working memory*.  
794 Journal of Experimental Psychology: Human Perception and Performance, 2006. **32**(6): p. 1436.
- 795 33. Bays, P.M., et al., *Temporal dynamics of encoding, storage, and reallocation of visual working memory*.  
796 Journal of vision, 2011. **11**(10): p. 6-6.
- 797 34. Posner, M.I. and S.W. Keele, *Decay of visual information from a single letter*. Science, 1967. **158**(3797): p.  
798 137-139.
- 799 35. Phillips, W. and A. Baddeley, *Reaction time and short-term visual memory*. Psychonomic Science, 1971.  
800 **22**(2): p. 73-74.
- 801 36. Dick, A., *Iconic memory and its relation to perceptual processing and other memory mechanisms*.  
802 Perception & Psychophysics, 1974. **16**(3): p. 575-596.
- 803 37. Coltheart, M., *Iconic memory and visible persistence*. Perception & psychophysics, 1980. **27**(3): p. 183-  
804 228.
- 805 38. Ratcliff, R., et al., *Diffusion Decision Model: Current Issues and History*. Trends Cogn Sci, 2016. **20**(4): p.  
806 260-281.
- 807 39. Guo, Z.V., et al., *Procedures for behavioral experiments in head-fixed mice*. PLoS One, 2014. **9**(2): p.  
808 e88678.
- 809 40. Voss, A., J. Voss, and V. Lerche, *Assessing cognitive processes with diffusion model analyses: a tutorial*  
810 *based on fast-dm-30*. Front Psychol, 2015. **6**: p. 336.
- 811 41. Voss, A., M. Nagler, and V. Lerche, *Diffusion models in experimental psychology: a practical*  
812 *introduction*. Exp Psychol, 2013. **60**(6): p. 385-402.
- 813 42. Ratcliff, R., *A theory of memory retrieval*. Psychological Review, 1978. **85**(2): p. 59-108.
- 814 43. Hentschke, H. and M.C. Stüttgen, *Computation of measures of effect size for neuroscience data sets*.  
815 European Journal of Neuroscience, 2011. **34**(12): p. 1887-1894.
- 816 44. Smith, P.L. and R. Ratcliff, *An integrated theory of attention and decision making in visual signal*  
817 *detection*. Psychol Rev, 2009. **116**(2): p. 283-317.
- 818 45. Brown, J., *Some tests of the decay theory of immediate memory*. Quarterly Journal of Experimental  
819 Psychology, 1958. **10**(1): p. 12-21.
- 820 46. Gold, J.M., et al., *Visual memory decay is deterministic*. Psychological Science, 2005. **16**(10): p. 769-774.
- 821 47. Zhang, W. and S.J. Luck, *Sudden death and gradual decay in visual working memory*. Psychological  
822 science, 2009. **20**(4): p. 423-428.
- 823 48. Barrouillet, P. and V. Camos, *As time goes by: Temporal constraints in working memory*. Current  
824 Directions in Psychological Science, 2012. **21**(6): p. 413-419.
- 825 49. Ricker, T.J., E. Vergauwe, and N. Cowan, *Decay theory of immediate memory: From Brown (1958) to*  
826 *today (2014)*. The Quarterly Journal of Experimental Psychology, 2016. **69**(10): p. 1969-1995.

- 827 50. Whitney, D. and D.M. Levi, *Visual crowding: a fundamental limit on conscious perception and object*  
828 *recognition*. Trends Cogn Sci, 2011. **15**(4): p. 160-8.
- 829 51. Meier, P., E. Flister, and P. Reinagel, *Collinear features impair visual detection by rats*. Journal of vision,  
830 2011. **11**(3): p. 22-22.
- 831 52. Miller, J., *The flanker compatibility effect as a function of visual angle, attentional focus, visual transients,*  
832 *and perceptual load: a search for boundary conditions*. Percept Psychophys, 1991. **49**(3): p. 270-88.
- 833 53. Eriksen, B.A. and C.W. Eriksen, *Effects of noise letters upon the identification of a target letter in a*  
834 *nonsearch task*. Perception & Psychophysics, 1974. **16**(1): p. 143-149.
- 835 54. Fan, J., et al., *Testing the efficiency and independence of attentional networks*. J Cogn Neurosci, 2002.  
836 **14**(3): p. 340-7.
- 837 55. Sperling, G., *The information available in brief visual presentations*. Psychological monographs: General  
838 and applied, 1960. **74**(11): p. 1.
- 839 56. Postle, B. and T. Pasternak, *Short term and working memory*. Encyclopedia of Neuroscience. San Diego,  
840 CA: Elsevier, 2009: p. 783-9.
- 841 57. Cowan, N., *What are the differences between long-term, short-term, and working memory?* Progress in  
842 brain research, 2008. **169**: p. 323-338.
- 843 58. Liu, D., et al., *Medial prefrontal activity during delay period contributes to learning of a working memory*  
844 *task*. Science, 2014. **346**(6208): p. 458-63.
- 845 59. Resulaj, A., et al., *First spikes in visual cortex enable perceptual discrimination*. Elife, 2018. **7**: p. e34044.
- 846 60. Andermann, M.L., A.M. Kerlin, and R.C. Reid, *Chronic cellular imaging of mouse visual cortex during*  
847 *operant behavior and passive viewing*. Front Cell Neurosci, 2010. **4**: p. 3.
- 848 61. Wong, A.A. and R.E. Brown, *Visual detection, pattern discrimination and visual acuity in 14 strains of*  
849 *mice*. Genes Brain Behav, 2006. **5**(5): p. 389-403.
- 850 62. Ohzawa, I., G. Sclar, and R.D. Freeman, *Contrast gain control in the cat visual cortex*. Nature, 1982.  
851 **298**(5871): p. 266-8.
- 852 63. Shevinsky, C.A. and P. Reinagel, *The interaction between elapsed time and decision accuracy differs*  
853 *between humans and rats*. Frontiers in neuroscience, 2019. **13**: p. 1211.

854

855

856 **Extended Data**

857  
858

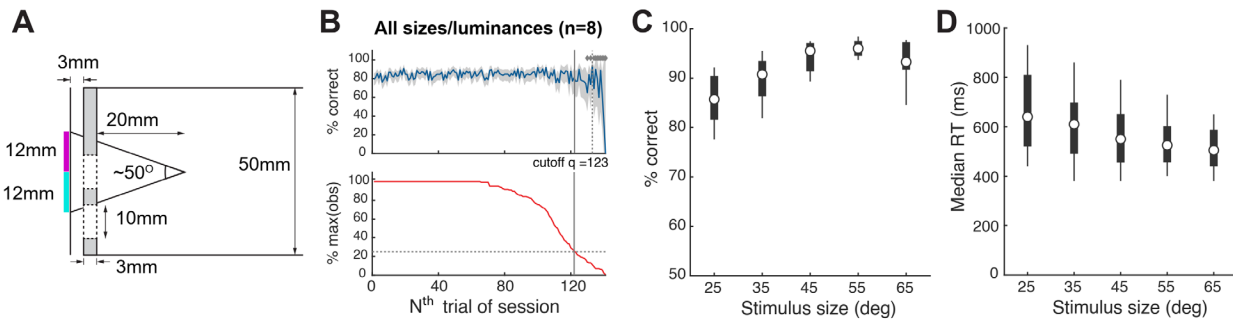

860 **Figure 1-1. Extended data for Figure 1.**

861 **(A)** Lateral view of the schematic experimental setup showing the relative position of the touchscreen (leftmost  
862 vertical line), the plexiglass mask (grey-filled vertical bar), and the tube within which mice move (50 mm diameter);  
863 the plexiglass mask is positioned 3 mm in front of the touchscreen. Dashed lines indicate the central response hole  
864 (lower dashed lines), and left/right response holes (upper dashed lines; 10 mm diameter). For single-stimulus  
865 discrimination, the center of the stimulus is aligned with the center of left/right response holes in elevation, and with  
866 the central hole in azimuth (see Fig.1A). For experiments involving two stimulus locations (i.e., flanker task), the  
867 upper (magenta) and lower (cyan) locations of the stimulus are indicated as colored bars (see also Fig. 4A). The 60  
868 pixels x 60 pixels (12mm x 12mm) stimulus subtends a visual angle of 25° when viewed from 20 mm front of the  
869 plexiglass mask. **(B)** Identification of trials towards the end of the 30 min behavioral sessions that corresponded to  
870 animals being poorly engaged in the task (Methods and [24]). Top panel: Time course of overall response accuracy  
871 across mice as a function of trial number within sessions. Accuracy obtained from trials pooled across all mice and  
872 sessions, and computed as a function of trial number within session (blue; Methods). Grey shading: bootstrapped  
873 estimates of the 95% confidence interval of the accuracy (gray; Methods). Diamonds on top: trials whose accuracy  
874 not significantly different from chance. Dashed vertical line: first trial at which the accuracy was not different from  
875 chance (50%), and stayed indistinguishable from chance for 3/5 of the next 5 trials (Methods). Data show increased  
876 variability and worse performance towards the end of sessions. Bottom panel: Number of actual observations across  
877 mice for each trial number, as a percentage of the maximal number of possible observations ( $\Sigma$  mice\*sessions), plotted  
878 as a function of trial number within session (red). Solid vertical line: first trial at which the number of observations  
879 drops below 25%. Data show drop in the number of observations available to reliably assess performance towards the  
880 end of sessions. Based on these data, all trials above 122 of each behavioral session of this experiment were dropped  
881 from analysis (Methods). Results in Fig. 1 are based on data from trials 1-122 from each behavioral session. **(C)**  
882 Response accuracy as a function of stimulus size (n=9 mice; p=0.001, 1-way ANOVA). In these experiments, stimulus  
883 size was manipulated independently (without manipulation of luminance; unlike in Figure 1). All stimuli were at the  
884 highest luminance (130 cd/m<sup>2</sup>, or Michelson-contrast of 98%). **(D)** Median RT as a function of stimulus size (n=9  
885 mice; p=0.205, 1-way ANOVA).

886



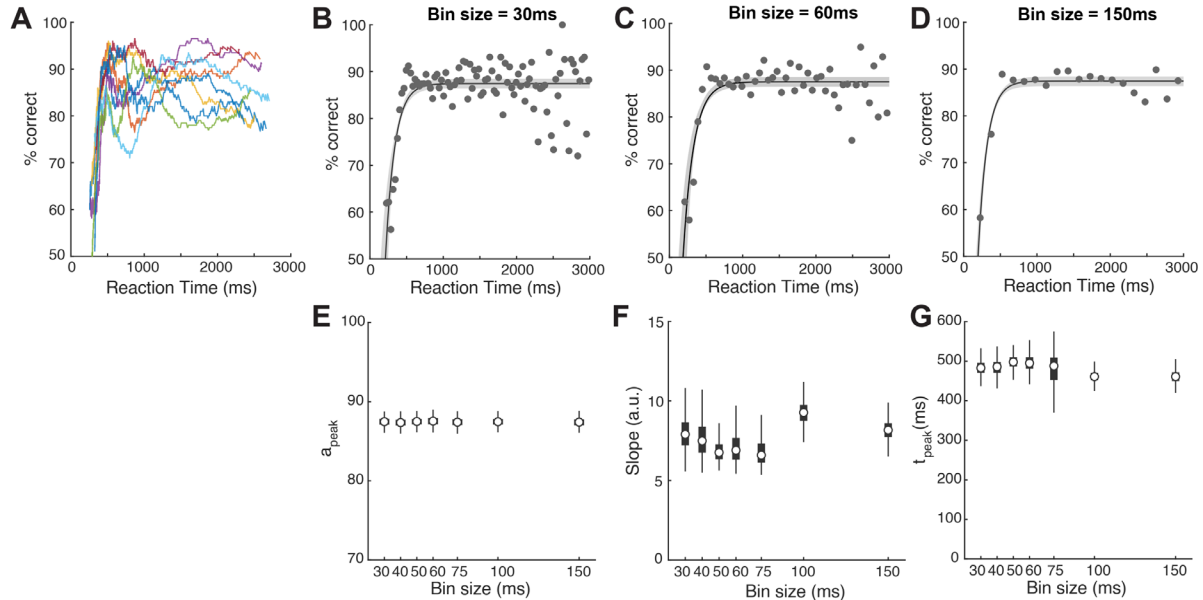

888 **Figure 2-1. Extended data for Figure 2: CAFs of individual mice and effect of bin size.**  
 889 (A) The general pattern of conditional accuracy curves across mice. Each color represents one single mouse. Each  
 890 curve was generated by pooling all trials (of various stimulus size and luminance) from one mouse, sort the trials by  
 891 RT, and then do a moving average (window size = 200 trials) to plot the mean accuracy (y) at mean RT (x) of the time  
 892 window. (B-D) Fitting of the conditional accuracy function (CAF) in various bin sizes. (B) Bin size = 30ms; (C) Bin  
 893 size = 60ms; (D) Bin size = 150ms; (E-G) Estimates of the quantitative metrics of the CAF in various bin sizes. (E)  
 894 peak conditional accuracy ( $a_{\text{peak}}$ ); (F) slope parameter; and (G) time to reach peak conditional accuracy ( $t_{\text{peak}}$ ).  
 895  
 896  
 897  
 898  
 899

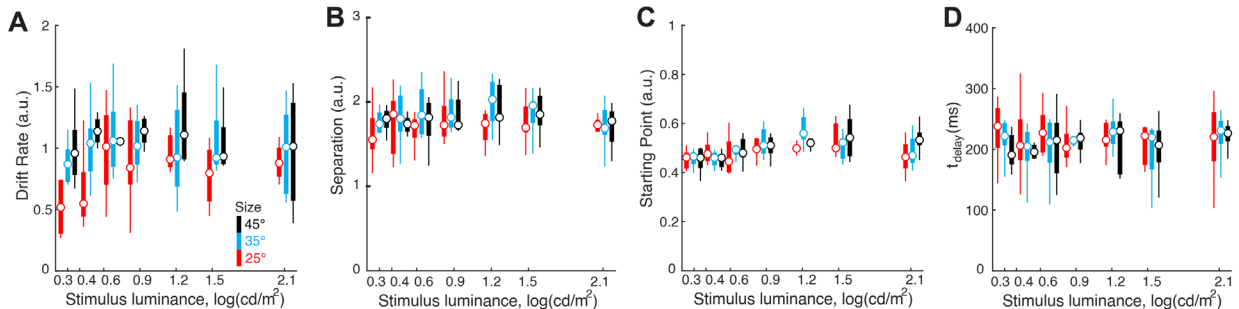

901  
 902 **Figure 2-2. Extended data for Figure 2: Estimates of all four parameters of the drift diffusion model. (A)** Drift  
 903 rate; 2-way ANOVA,  $p=0.028$  (luminance),  $p<0.001$  (size),  $p=0.767$  (interaction). (B) Boundary separation; 2-way  
 904 ANOVA,  $p=0.171$  (luminance),  $p=0.026$  (size),  $p=0.953$  (interaction). (C) Starting point; 2-way ANOVA,  $p<0.001$   
 905 (luminance),  $p=0.325$  (size),  $p=0.098$  (interaction). (D)  $t_{\text{delay}}$ ; 2-way ANOVA,  $p=0.523$  (luminance),  $p=0.308$  (size),  
 906  $p=0.931$  (interaction).  
 907  
 908

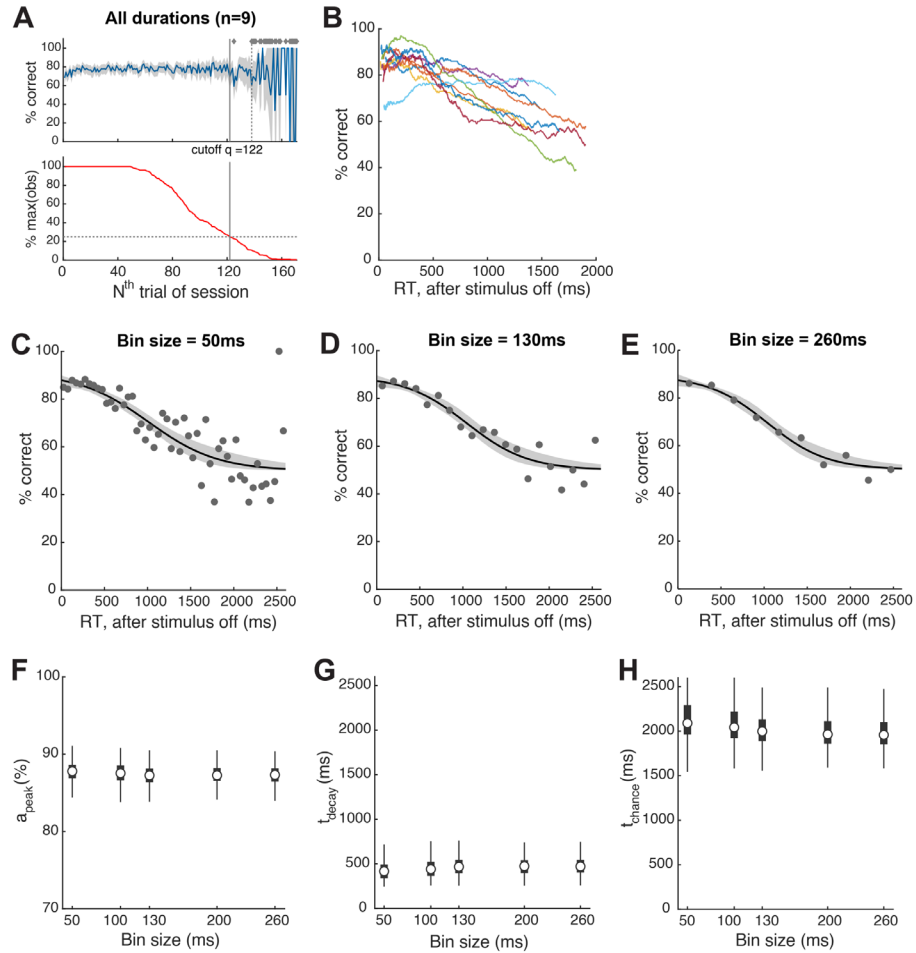

910  
 911 **Figure 3-1. Extended data for Figure 3: CAFs of individual mice and effect of bin size.** (A) Identification of trials  
 912 towards the end of the 30 min behavioral sessions that corresponded to animals being poorly engaged in the task  
 913 (Methods); conventions identical to those in Fig.1-1B. (B) The general pattern of conditional accuracy curves across  
 914 mice. Each color represents one single mouse. Each curve was generated by pooling all trials (of various stimulus size  
 915 and luminance) from one mouse, sort the trials by RT, and then do a moving average (window size = 200 trials) to  
 916 plot the mean accuracy (y) at mean RT (x) of the time window. (C-E) Fitting of the conditional accuracy function  
 917 (CAF) in various bin sizes. (C) Bin size = 50ms; (D) Bin size = 130ms; (E) Bin size = 260ms; (F-H) Estimates of the  
 918 quantitative metrics of the CAF in various bin sizes. (F) peak conditional accuracy ( $a_{\text{peak}}$ ); (G) the time at which  
 919 conditional accuracy started to decay ( $t_{\text{decay}}$ ); and (G) the time at which conditional accuracy fell to the chance level  
 920 ( $t_{\text{chance}}$ ).  
 921

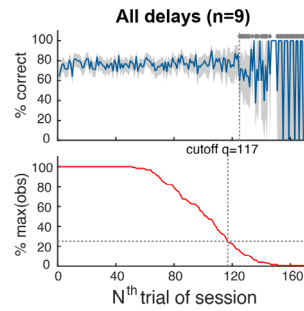

923

924 **Figure 5-1. Extended data for stimulus onset delay experiment.**

925 Identification of trials towards the end of the 30 min behavioral sessions that corresponded to animals being poorly  
926 engaged in the task (Methods). All conventions are as in Fig.1-1B. Based on these data, all trials above 116 of each  
927 behavioral session of this experiment were dropped from analysis. Results in Fig.5 are based on data from trials 1-  
928 116 from each behavioral session.

929
